# Supplementary material
Source: Springer Nature journal article supplement (https://www.springermedizin.de/resource/supplementary/13098_2014_319_MOESM4_ESM.pdf/9671072)

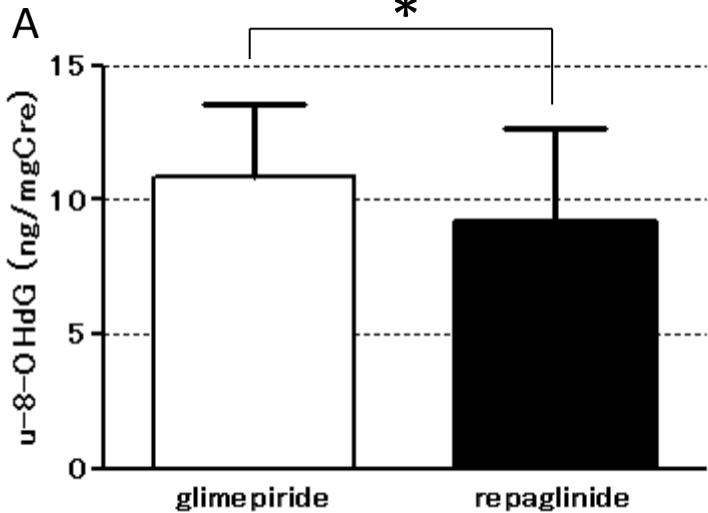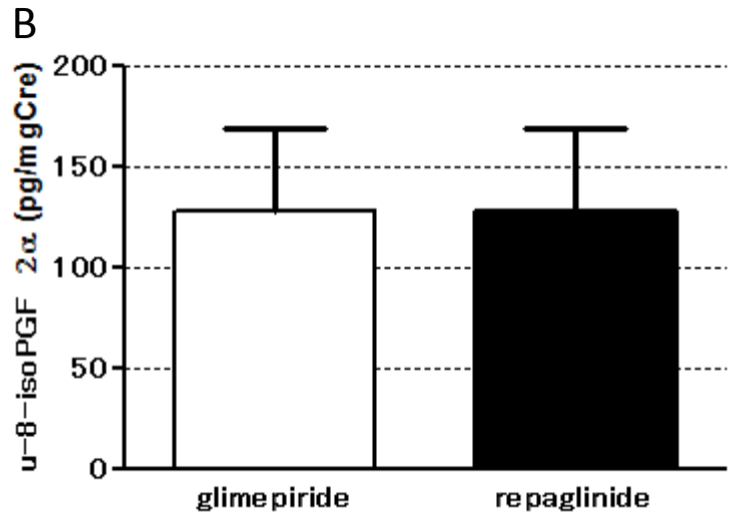

Supplement: MOESM4 [file 9671072]
